# Supplementary material
Source: publisher site journal article supplement (https://www.dovepress.com/article/452152)
Supplement: Supplementary file 1 [file get_supplementary_file.php]

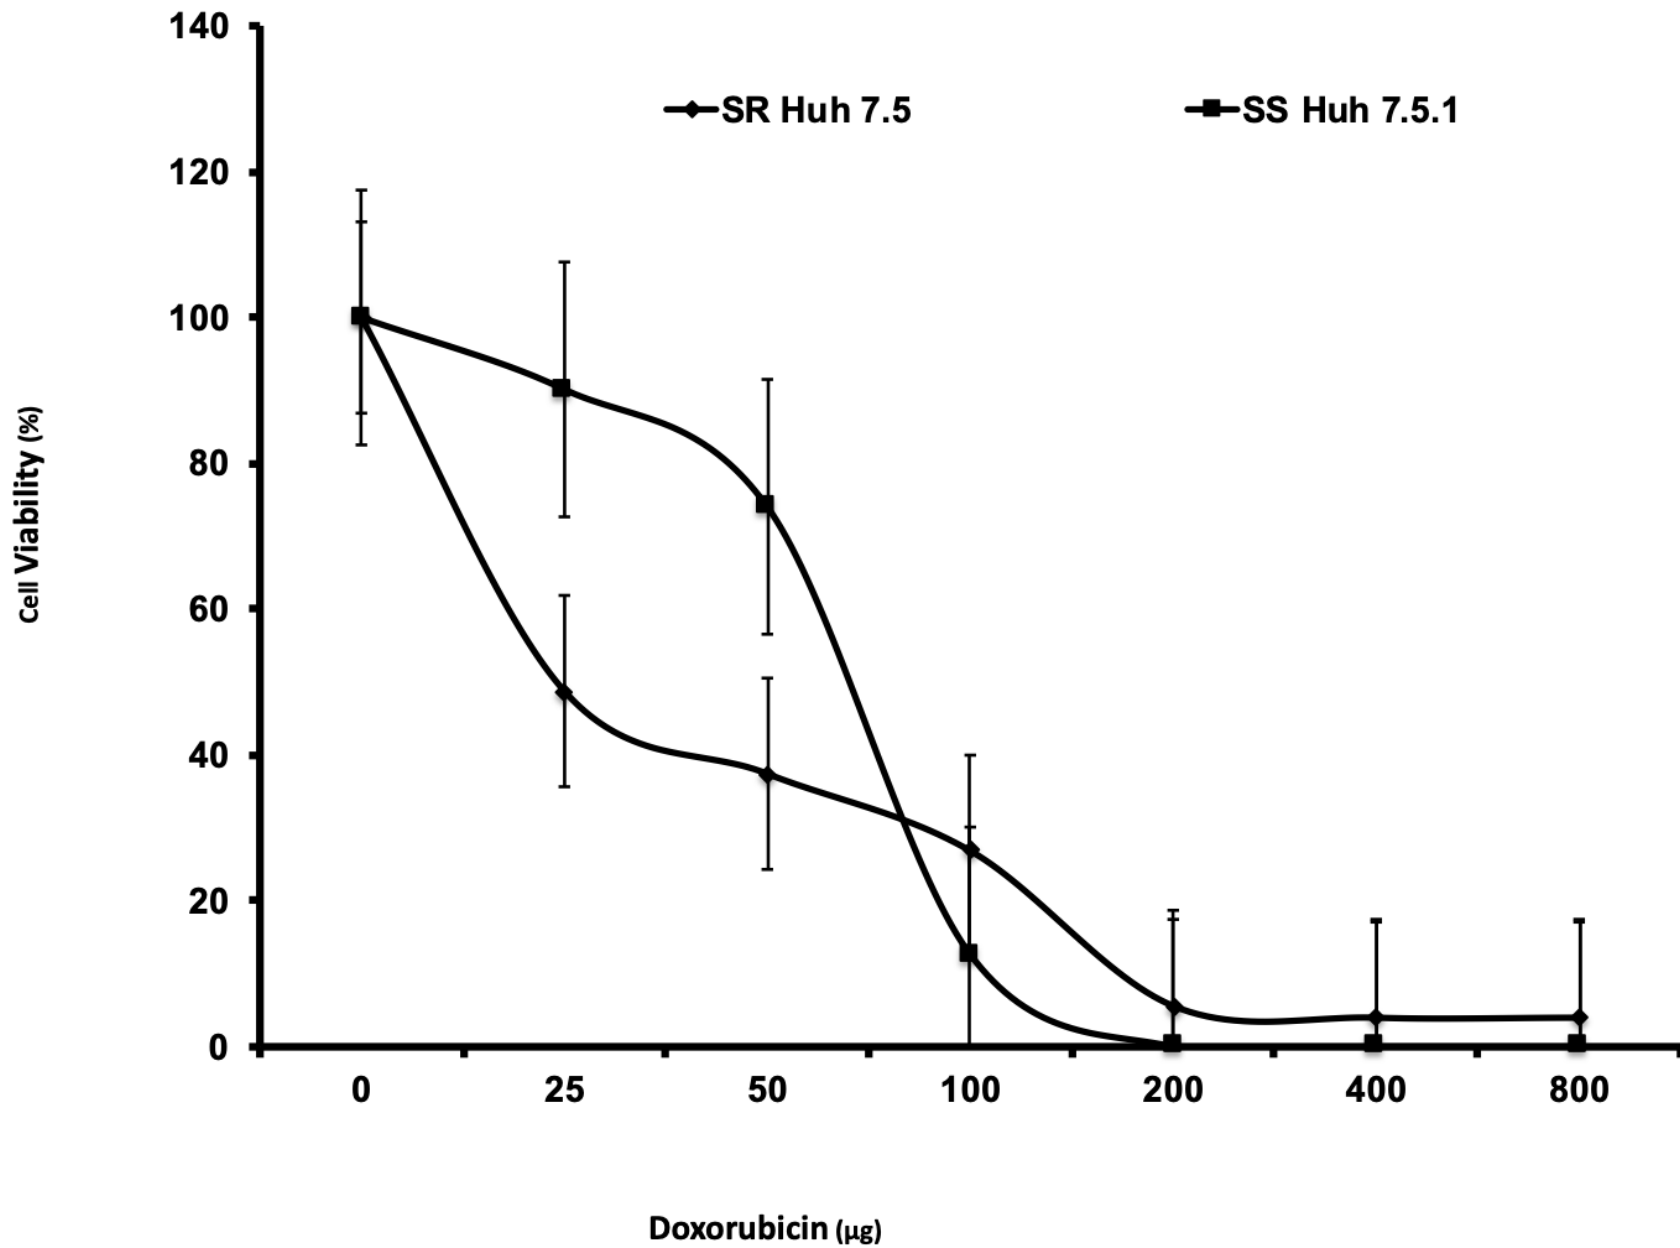

**Supplemental Figure 1:** MTT assay of SR Huh 7.5 and SS Huh 7.5.1 cells treated with increasing concentrations of doxorubicin.

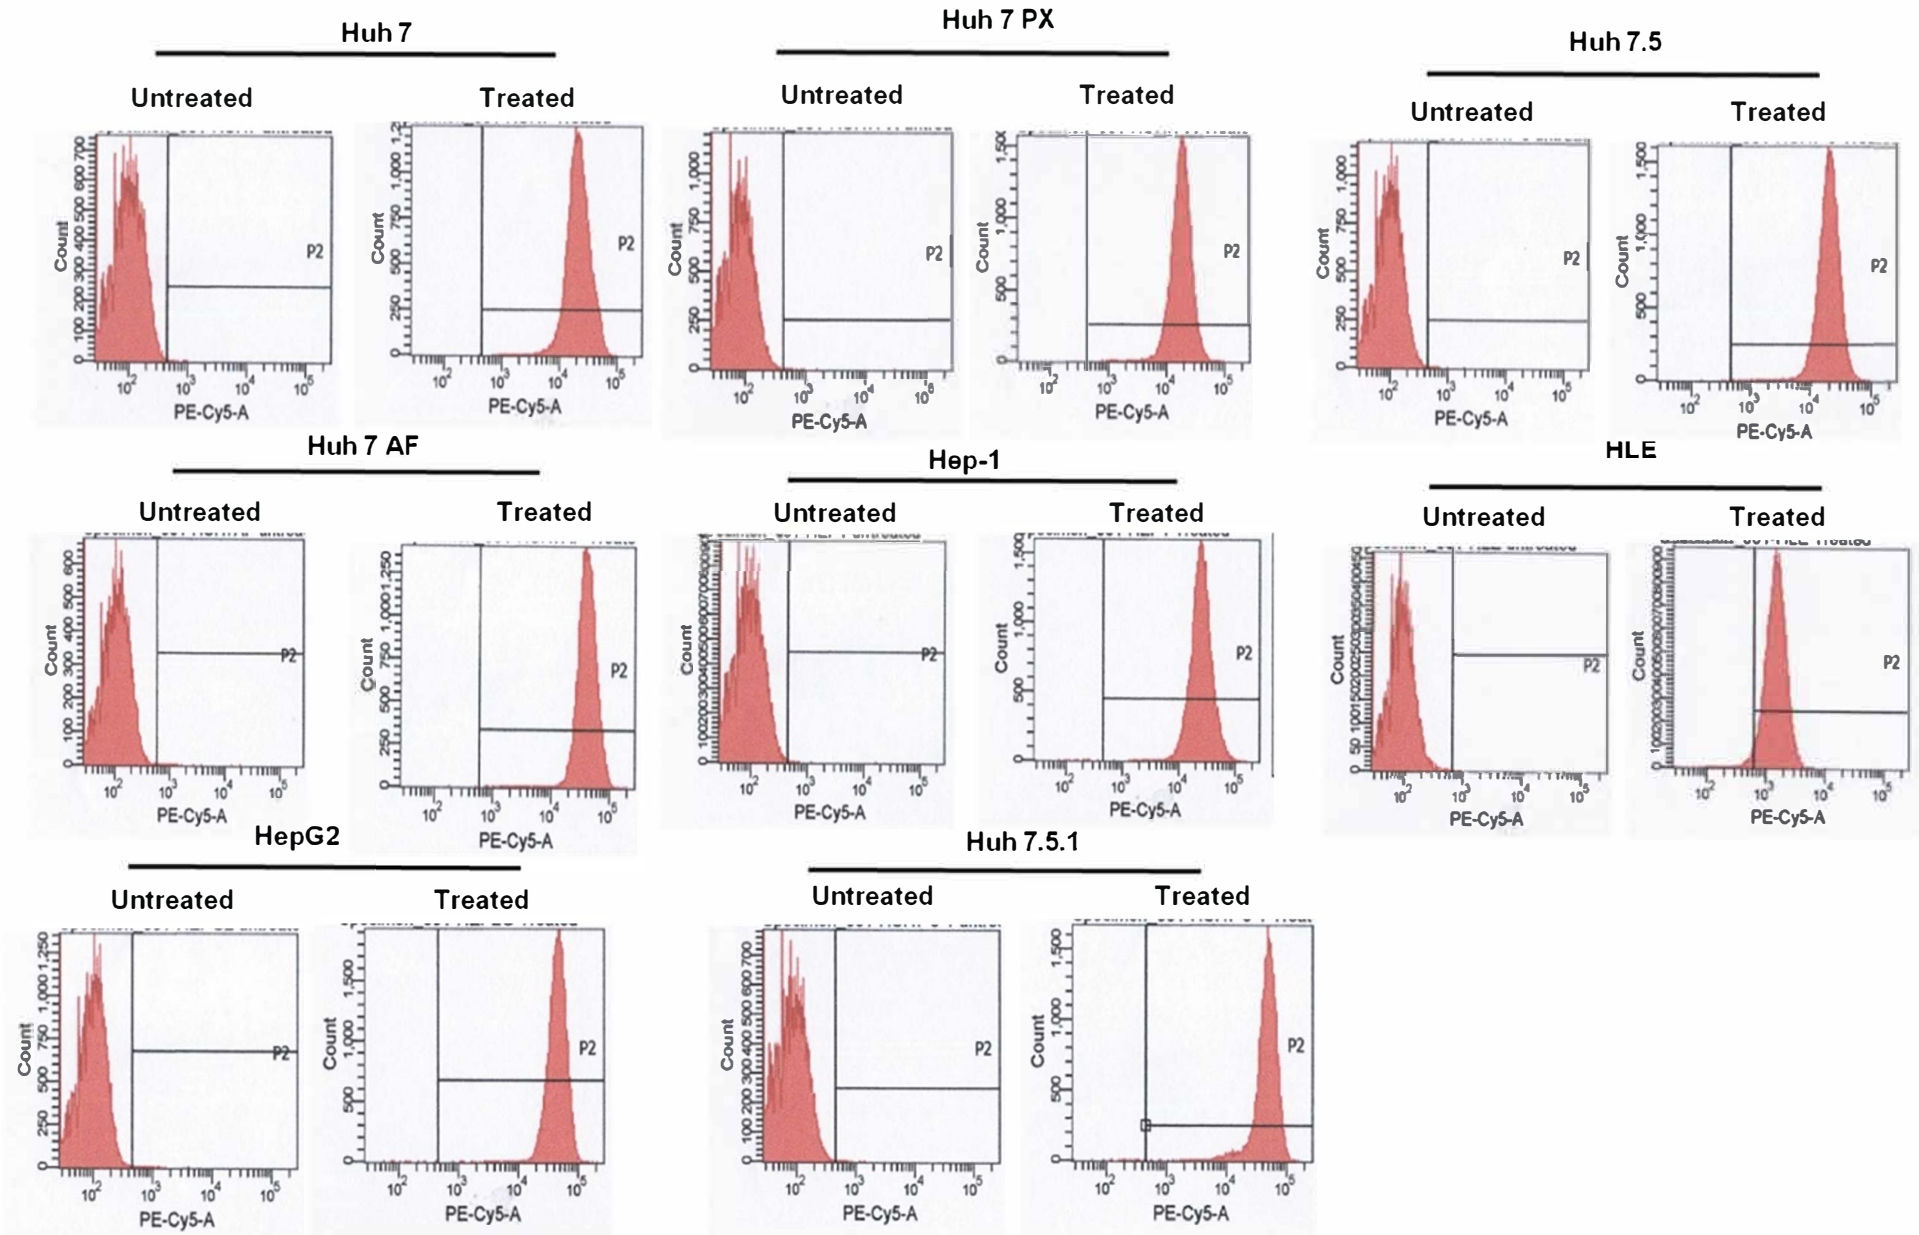

Supplemental Figure 2: Doxorubicin uptake of HCC cells determined by flow cytometry. Cells were treated with 200  $\mu$ g of doxorubicin and after 4 hours cells were washed and analyzed by flow cytometry. Cells without doxorubicin treatment used as negative control.

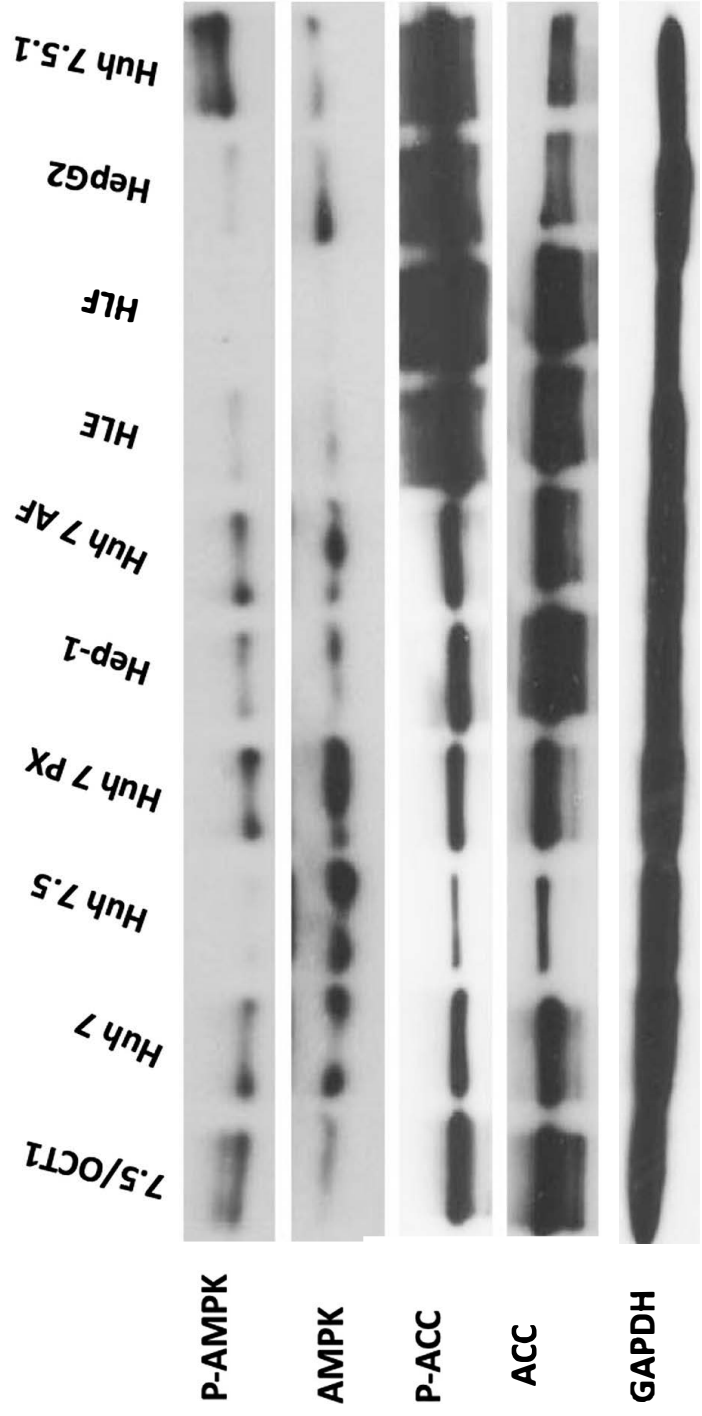

**Supplemental Figure 3:** Western blot analysis results show metformin uptake results of nine different HCC cell line. Stable OCT1 expression increased metformin uptake of SR Huh 7.5 cells and induced pAMPK level and pACC level.

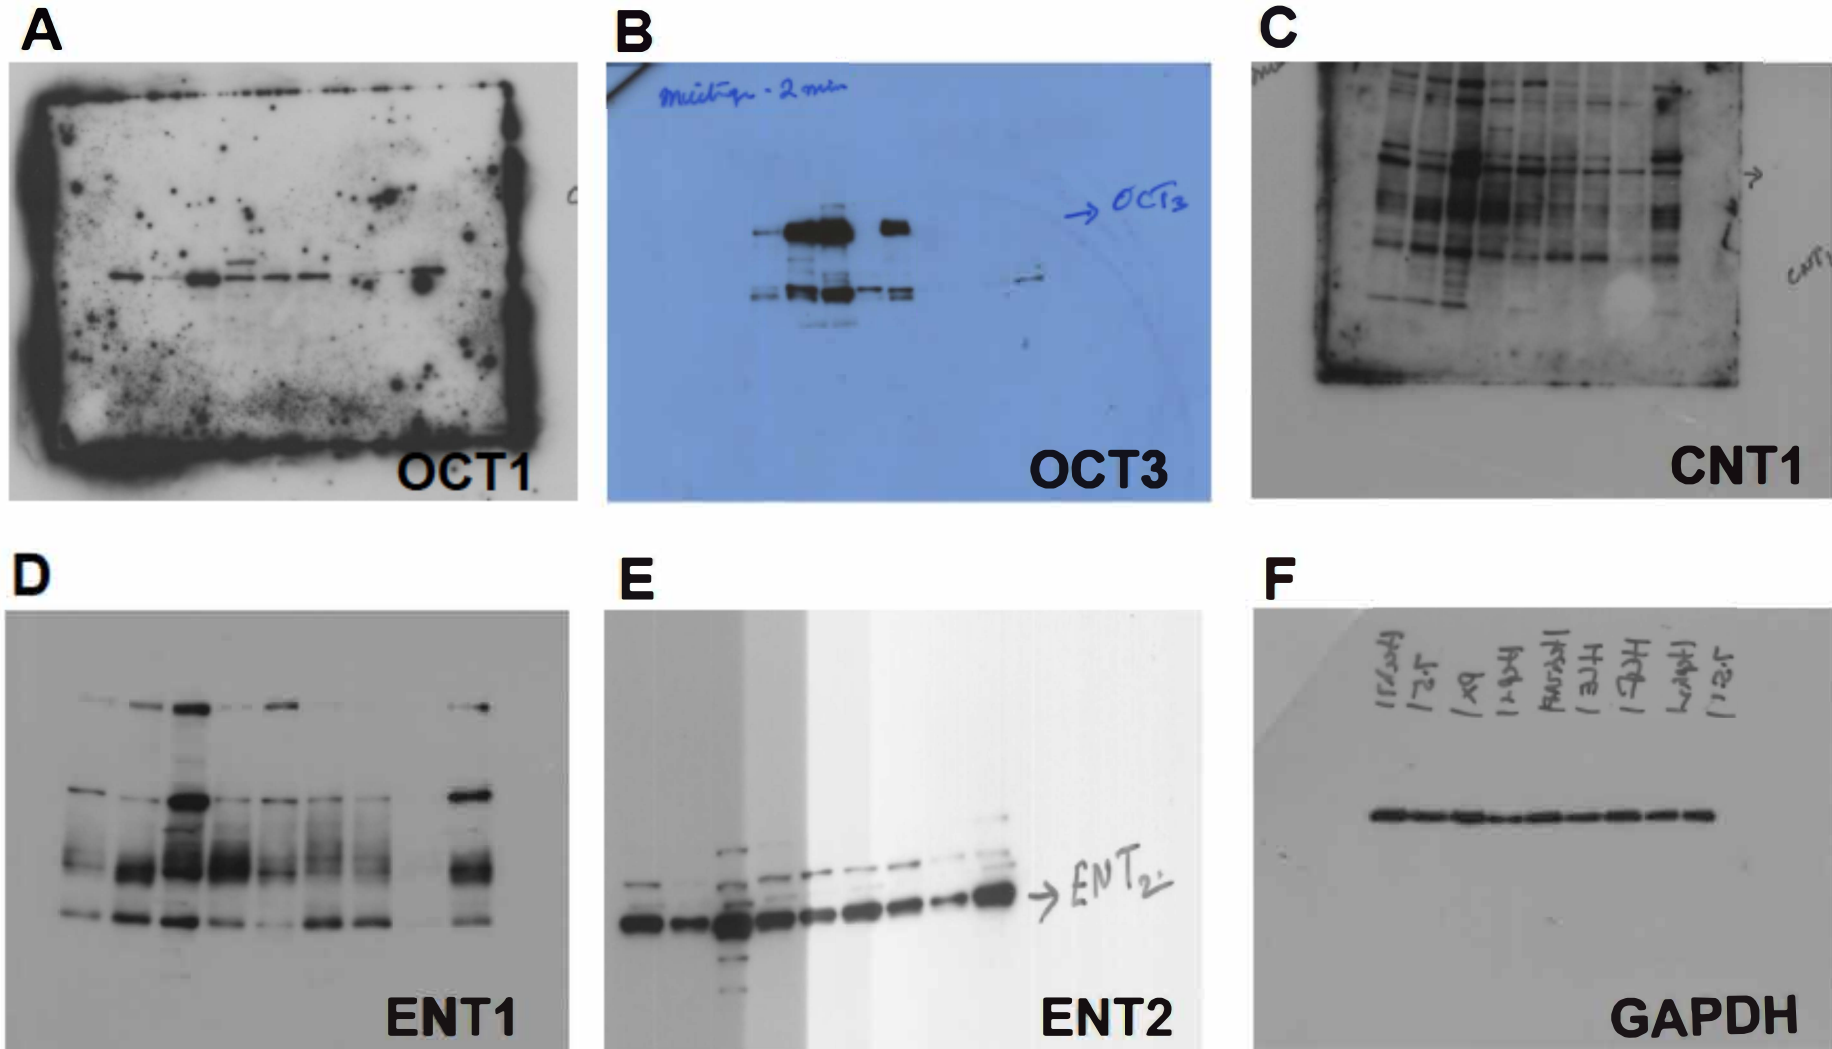

Supplemental Figure 4 : Orjinal Western Blood Images of Figure 3B

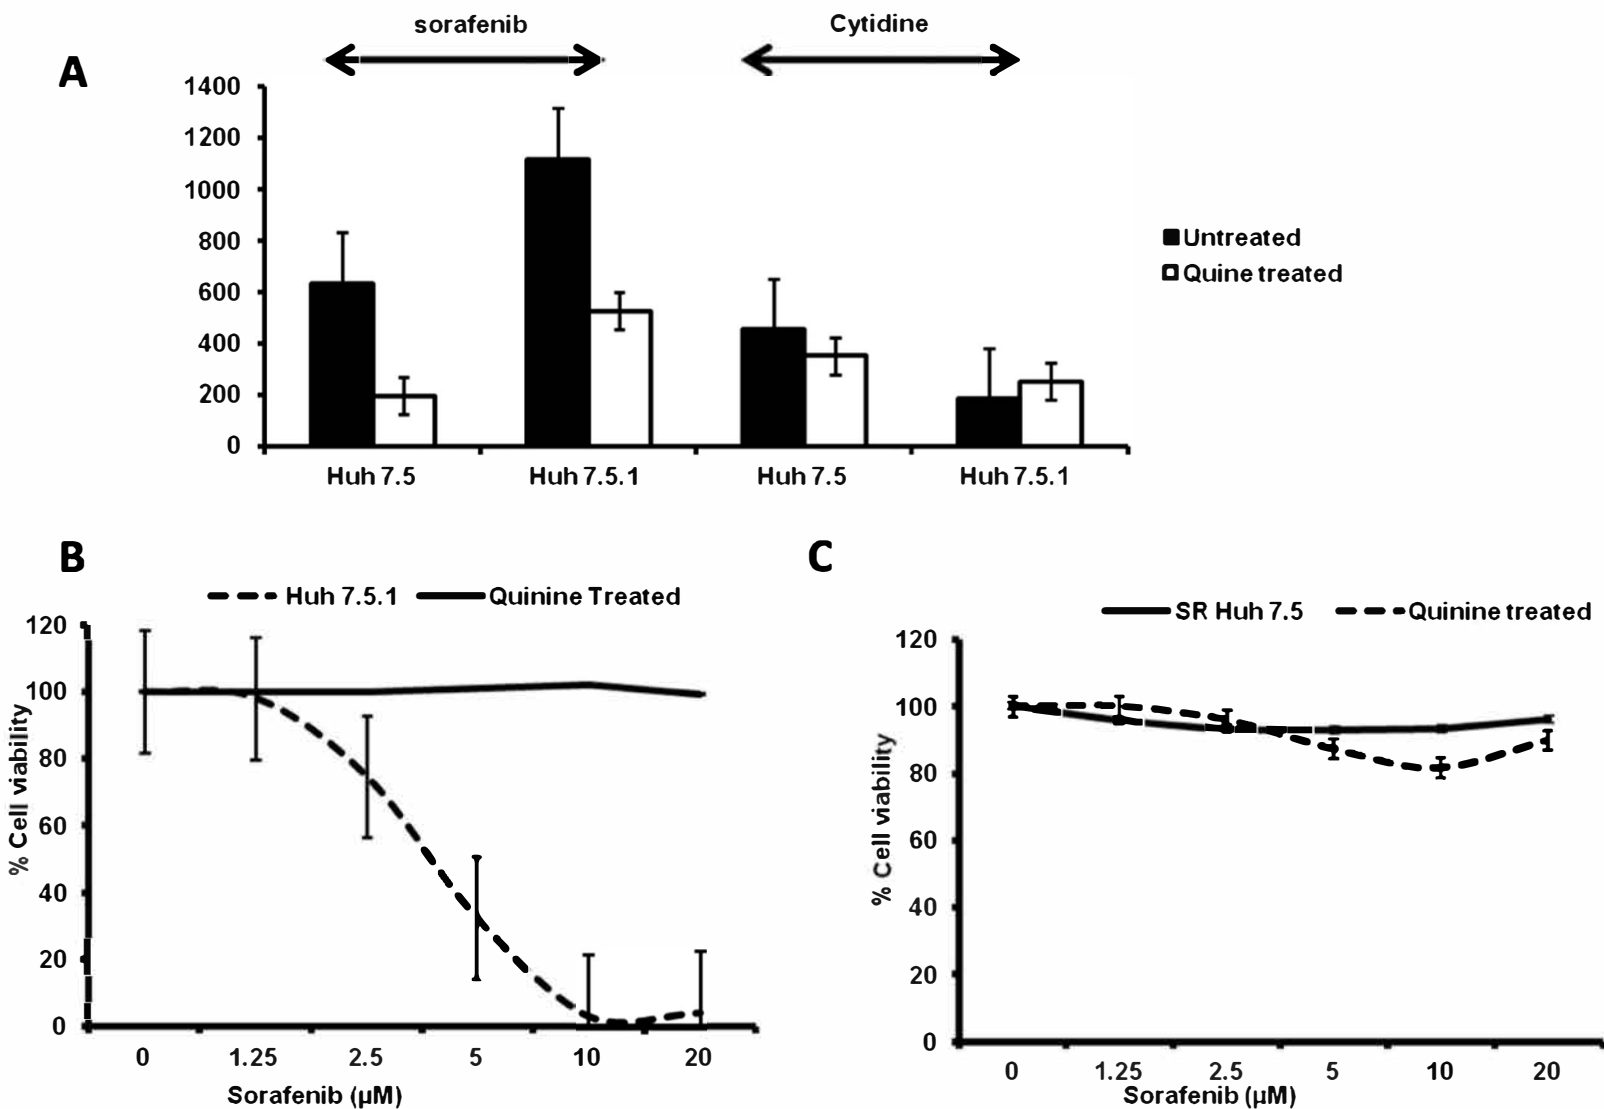

**Supplemental Figure 5:** Sorafenib uptake and MTT assay between resistant cell line (SR Huh 7.5) and sensitive (SS Huh 7.5.1) cells in the presence and absence of quinine. (A). Show the results of sorafenib uptake of the resistant and sensitive cell line with or without quinine treatment. Show the results of cytidine uptake between resistant and sensitive cells. (B). Show the MTT assay showing pre-treatment of quinine reduced sorafenib cytotoxicity in sensitive cell line (SS Huh 7.5.1). (C). Show that quinine treatment did not alter the sorafenib sensitivity of the resistant cell line (SR Huh 7.5 cells).

**Supplemental Table 1: Evaluation of OCT1 expression in HCC patient samples**

| Samples | HCV | Diagnosis     | Non-tumor |        |             |       | Tumor            |            |             |       |                  |            |             |
|---------|-----|---------------|-----------|--------|-------------|-------|------------------|------------|-------------|-------|------------------|------------|-------------|
|         |     |               | No        | Status | H&E stained | Score | Staining pattern | Percentage | Total score | Score | Staining pattern | Percentage | Total score |
| 1       | (+) | Cirrhosis/HCC | 2         |        |             | 2     | Homogenous       | 100%       | 200         | 3     | Patchy           | 50%        | 150         |
| 2       | (-) | Cirrhosis/HCC | 2         |        |             | 2     | Homogenous       | 100%       | 200         | 2     | Patchy           | 30%        | 60          |
| 3       | (-) | Cirrhosis/HCC | 2         |        |             | 2     | Homogenous       | 100%       | 200         | 1     | Focal            | 5%         | 5           |
| 4       | (-) | Cirrhosis/HCC | 3         |        |             | 3     | Homogenous       | 100%       | 300         | 0     | Negative         | 0%         | 0           |
| 5       | (+) | Cirrhosis/HCC | 2         |        |             | 2     | Homogenous       | 100%       | 200         | 1     | Patchy           | 20%        | 20          |
| 6       | (+) | Cirrhosis/HCC | 2         |        |             | 2     | Homogenous       | 100%       | 200         | 3     | Patchy           | 40%        | 120         |
| 7       | (-) | Cirrhosis/HCC | 2         |        |             | 2     | Patchy           | 30%        | 60          | 3     | Homogenous       | 100%       | 300         |
| 8       | (-) | Cirrhosis/HCC | 3         |        |             | 3     | Homogenous       | 100%       | 300         | 3     | Homogenous       | 100%       | 300         |
| 9       | (+) | Cirrhosis/HCC | 2         |        |             | 2     | Homogenous       | 100%       | 200         | 3     | Patchy           | 30%        | 90          |
| 10      | (+) | Cirrhosis/HCC | 2         |        |             | 2     | Homogenous       | 100%       | 200         | 3     | Patchy           | 80%        | 240         |
| 11      | (-) | Cirrhosis/HCC | 3         |        |             | 3     | Homogenous       | 100%       | 300         | 1     | Negative         | 5%         | 5           |
| 12      | (-) | Cirrhosis/HCC | 3         |        |             | 3     | Homogenous       | 100%       | 300         | 1     | Homogenous       | 100%       | 100         |
| 13      | (-) | Cirrhosis/HCC | 1         |        |             | 1     | Homogenous       | 100%       | 100         | 0     | Negative         | 0%         | 0           |
| 14      | (+) | Cirrhosis/HCC | 3         |        |             | 3     | Patchy           | 60%        | 180         | 3     | Patchy           | 60%        | 180         |
| 15      | (+) | Cirrhosis/HCC | 3         |        |             | 3     | Homogenous       | 100%       | 300         | 0     | Negative         | 0%         | 0           |
| 16      | (-) | Cirrhosis/HCC | 2         |        |             | 2     | Patchy           | 50%        | 100         | 0     | Negative         | 0%         | 0           |
| 17      | (-) | Cirrhosis/HCC | 3         |        |             | 3     | Homogenous       | 100%       | 300         | 1     | Focal            | 20%        | 20          |
| 18      | (+) | Cirrhosis/HCC | 1         |        |             | 1     | Patchy           | 40%        | 40          | 3     | Patchy           | 50%        | 150         |
| 19      | (+) | Cirrhosis/HCC | 2         |        |             | 2     | Homogenous       | 100%       | 200         | 0     | Negative         | 0%         | 0           |
| 20      | (+) | Cirrhosis/HCC | 3         |        |             | 3     | Homogenous       | 100%       | 300         | 3     | Patchy           | 60%        | 180         |

No staining-0, Weak staining-1, Medium staining-2, Strong staining-3

**Supplemental Table 2: Evaluation of OCT3 expression in HCC patient samples**

| Samples | Diagnosis     | Non-tumor |             |       |                  | Tumor      |             |       |                  |
|---------|---------------|-----------|-------------|-------|------------------|------------|-------------|-------|------------------|
|         |               | No        | H&E stained | Score | Staining pattern | Percentage | Total score | Score | Staining pattern |
| 1       | Cirrhosis/HCC | 3         | Homogenous  | 100%  | 300              | 3          | Patchy      | 100%  | 300              |
| 2       | Cirrhosis/HCC | 2         | Homogenous  | 100%  | 200              | 2          | Patchy      | 100%  | 200              |
| 3       | Cirrhosis/HCC | 2         | Homogenous  | 20%   | 200              | 2          | Focal       | 10%   | 30               |
| 4       | Cirrhosis/HCC | 3         | Homogenous  | 80%   | 300              | 2          | Negative    | 40%   | 80               |
| 5       | Cirrhosis/HCC | 2         | Homogenous  | 100%  | 200              | 2          | Patchy      | 80%   | 160              |
| 6       | Cirrhosis/HCC | 3         | Homogenous  | 100%  | 300              | 2          | Patchy      | 30%   | 60               |
| 7       | Cirrhosis/HCC | 2         | Patchy      | 100%  | 200              | 2          | Homogenous  | 100%  | 200              |
| 8       | Cirrhosis/HCC | 2         | Homogenous  | 100%  | 200              | 2          | Homogenous  | 20%   | 40               |
| 9       | Cirrhosis/HCC | 3         | Homogenous  | 100%  | 300              | 2          | Patchy      | 100%  | 200              |
| 10      | Cirrhosis/HCC | 1         | Homogenous  | 100%  | 200              | 1          | Patchy      | 20%   | 100              |
| 11      | Cirrhosis/HCC | 2         | Homogenous  | 100%  | 200              | 1          | Negative    | 10%   | 10               |
| 12      | Cirrhosis/HCC | 2         | Homogenous  | 100%  | 200              | 1          | Homogenous  | 70%   | 70               |
| 13      | Cirrhosis/HCC | 2         | Homogenous  | 100%  | 200              | 2          | Negative    | 100%  | 200              |
| 14      | Cirrhosis/HCC | 2         | Patchy      | 100%  | 200              | 2          | Patchy      | 100%  | 200              |
| 15      | Cirrhosis/HCC | 2         | Homogenous  | 100%  | 200              | 1          | Negative    | 100%  | 100              |
| 16      | Cirrhosis/HCC | 2         | Patchy      | 100%  | 200              | 2          | Negative    | 70%   | 140              |
| 17      | Cirrhosis/HCC | 3         | Homogenous  | 100%  | 300              | 1          | Focal       | 10%   | 10               |
| 18      | Cirrhosis/HCC | 2         | Patchy      | 100%  | 200              | 1          | Patchy      | 50%   | 50               |
| 19      | Cirrhosis/HCC | 3         | Homogenous  | 100%  | 300              | 2          | Negative    | 100%  | 200              |
| 20      | Cirrhosis/HCC | 3         | Homogenous  | 100%  | 300              | 2          | Patchy      | 100%  | 200              |

No staining-0, Weak staining-1, Medium staining-2, Strong staining-3
